# Supplementary material for: Sensitivity of a Dynamic Model of Air Traffic Emissions to Technological and Environmental Factors
Source: MDPI journal article supplement (doi:10.3390/ijerph192215406), 2022-11-21
Supplement: s1 [file s1]

Table S1: Data sources.

|                                                                     |                                                                                                                                                                                                                                                                                                                                                                                                                                                                                                                                                                                                                                                |
|---------------------------------------------------------------------|------------------------------------------------------------------------------------------------------------------------------------------------------------------------------------------------------------------------------------------------------------------------------------------------------------------------------------------------------------------------------------------------------------------------------------------------------------------------------------------------------------------------------------------------------------------------------------------------------------------------------------------------|
| Finland Transport Research Centre (LIPASTO)                         | Average passenger aircraft emission and energy consumption by passenger kilometre <a href="https://www.icao.int/environmental-protection/Pages/env2016.asp">https://www.icao.int/environmental-protection/Pages/env2016.asp</a>                                                                                                                                                                                                                                                                                                                                                                                                                |
| EUROSTAT                                                            | Air Transport by passengers by country (yearly data) <a href="https://ec.europa.eu/eurostat/web/transport/data/main-tables">https://ec.europa.eu/eurostat/web/transport/data/main-tables</a>                                                                                                                                                                                                                                                                                                                                                                                                                                                   |
| The International Council on Clean Transportation (ICCT)            | Country-specific operations and CO <sub>2</sub> emissions data for commercial passenger transport, 2018. Supplemental data from ICCT Working Paper 2019-16 <a href="https://theicct.org/publications/co2-emissions-commercial-aviation-2018">https://theicct.org/publications/co2-emissions-commercial-aviation-2018</a>                                                                                                                                                                                                                                                                                                                       |
| Intergovernmental Panel on Climate Change (IPCC 1995a)              | First approach at CO <sub>2</sub> equivalent <a href="https://www.ipcc.ch/site/assets/uploads/2018/02/ipcc_wg3_ar5_annex-ii.pdf">https://www.ipcc.ch/site/assets/uploads/2018/02/ipcc_wg3_ar5_annex-ii.pdf</a>                                                                                                                                                                                                                                                                                                                                                                                                                                 |
| Intergovernmental Panel on Climate Change (IPCC 2000)               | Data update of the CO <sub>2</sub> equivalent <a href="https://www.ipcc.ch/site/assets/uploads/2018/03/emissions_scenarios-1">https://www.ipcc.ch/site/assets/uploads/2018/03/emissions_scenarios-1</a>                                                                                                                                                                                                                                                                                                                                                                                                                                        |
| Intergovernmental Panel on Climate Change (IPCC 2007)               | The Role of Aircraft in Climate Change-Evaluation of Sample Scenarios (Fig. 6-15: Bar charts of radiative forcing in 2050) <a href="https://archive.ipcc.ch/ipccreports/sres/aviation/index.php?idp=83">https://archive.ipcc.ch/ipccreports/sres/aviation/index.php?idp=83</a>                                                                                                                                                                                                                                                                                                                                                                 |
| Intergovernmental Panel on Climate Change (IPCC 2014)               | Climate Change 2014 Synthesis Report Summary for Policymakers (Fig. 4.1 Sectorial CO <sub>2</sub> emissions by sector and total non-CO <sub>2</sub> greenhouse gas (GHG) emission) SPM 2.1 Key drivers of future climate Cumulative emissions of CO <sub>2</sub> largely determine global mean surface warming by the late 21st. century and beyond. Projections of greenhouse gas emissions vary over a wide range, depending on both socioeconomic development and climate policy. <a href="https://www.ipcc.ch/site/assets/uploads/2018/02/AR5_SYR_FINAL_SPM.pdf">https://www.ipcc.ch/site/assets/uploads/2018/02/AR5_SYR_FINAL_SPM.pdf</a> |
| European Commission, Directorate-General for Mobility and Transport | Taxes in the field of aviation and their impact : final report, Publications Office, 2019, <a href="https://data.europa.eu/doi/10.2832/913591">https://data.europa.eu/doi/10.2832/913591</a>                                                                                                                                                                                                                                                                                                                                                                                                                                                   |
